# Supplementary material for: Synergistic Effect of a Plant-Derived Protein Hydrolysate and Arbuscular Mycorrhizal Fungi on Eggplant Grown in Open Fields: A Two-Year Study
Source: MDPI journal article supplement (doi:10.3390/horticulturae9050592), 2023-05-17
Supplement: s1 [file horticulturae-2369931-supplementary.pdf › horticulturae-2369931-supplementary.pdf]

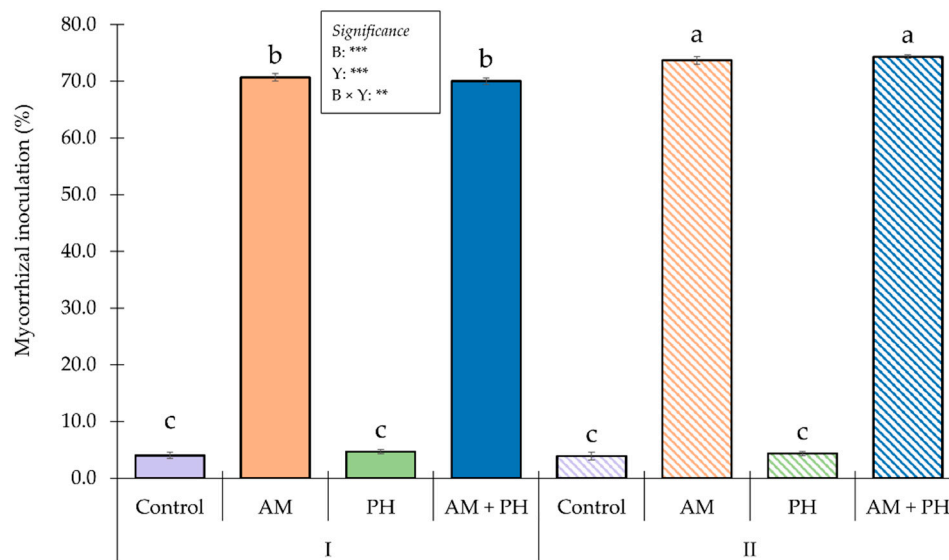

**Figure S1.** Mycorrhizal inoculation percentage as affected by biostimulant and year of cultivation. Data are presented as means  $\pm$  SE. Means with different letters are statistically dissimilar according to the Tukey HSD test at  $p \leq 0.05$ . \*\*: significant at  $p \leq 0.01$ ; \*\*\*: significant at  $p \leq 0.001$ . AM: arbuscular mycorrhizal fungi; PH: protein hydrolysates; I: 2020; II: 2021.
